1 **Simultaneous representation of a spectrum of dynamically**  
2 **changing value estimates during decision making**

3 **David Meder<sup>1,2</sup>, Nils Kolling<sup>1,3</sup>, Lennart Verhagen<sup>1</sup>, Marco K Wittmann<sup>1,3</sup>,**  
4 **Jacqueline Scholl<sup>1</sup>, Kristoffer H Madsen<sup>2</sup>, Oliver J Hulme<sup>2</sup>, Timothy EJ**  
5 **Behrens<sup>3</sup>, Matthew FS Rushworth<sup>1,3</sup>**

6

7 1 Department of Experimental Psychology, University of Oxford, South Parks  
8 Road, Oxford OX1 3UD, UK

9 2 Danish Research Centre for Magnetic Resonance; Centre for Functional and  
10 Diagnostic Imaging and Research, Copenhagen University Hospital  
11 Hvidovre; Hvidovre, 2650; Denmark.

12 3 Oxford Centre for Functional MRI of the Brain, Nuffield Department of  
13 Clinical Neurosciences, University of Oxford, John Radcliffe Hospital, Oxford  
14 OX3 9DU, UK

15

16

17 **Corresponding Author:**

18 David Meder: davidm@drcmr.dk

## 19 **Summary**

20 Decisions are based on value expectations derived from experience. We show  
21 that dorsal anterior cingulate cortex and three other brain regions hold multiple  
22 representations of choice value based on different time-scales of experience  
23 organized in terms of systematic gradients across the cortex. Some parts of each  
24 area represent value estimates based on recent reward experience while others  
25 represent value estimates based on experience over the longer term. The value  
26 estimates within these four brain areas interact with one another according to  
27 their temporal scaling. Some aspects of the representations change dynamically  
28 as the environment changes. The spectrum of value estimates may act as a  
29 flexible selection mechanism for combining experience-derived value  
30 information with other aspects of value to allow flexible and adaptive decisions  
31 in changing environments.

32

### 33 Introduction

34 When an organism makes a decision, it is guided by expectations about the  
35 values of potential choices. Estimates of value are, in turn, often dependent on  
36 past experience. How past experience should be used when deriving value  
37 estimates to guide decisions is not, however, always clear. While it might seem  
38 ideal to use the most experience possible, from both the recent and more distant  
39 past, this is only true if the environment is stable. In a changing environment it  
40 may be better to rely only on most recent experience because earlier experience  
41 is no longer informative<sup>1,2</sup>.

42 Previous studies have focused on value learning: how value estimates are  
43 updated after the choice is made and the choice outcome is witnessed<sup>1,2</sup>. These  
44 studies have emphasized that each outcome has a greater impact on value  
45 estimates when the environment is changeable or volatile; the learning rate (LR)  
46 is higher and so value estimates are updated more after each choice outcome.  
47 Similarly, each outcome has a greater effect on activity in brain areas such as  
48 dorsal anterior cingulate cortex (dACC) when the environment is volatile (Fig. 1).

49 However, while volatility affected dACC at the time of each decision-  
50 outcome, there was no evidence that it affected average dACC activity at the time  
51 of the next decision. It is therefore unclear how dACC activity might change as a  
52 function of the learning rate determining the choice value estimates that guide  
53 decision making at the point in time when decisions are actually made (Fig.1).  
54 This is this question that we address here. Rather than investigating dACC  
55 activity at the time of *decision outcomes* and in relation to learning we focus

56 instead on how dACC represents value estimates employed at the time of  
57 *decision making*.

58

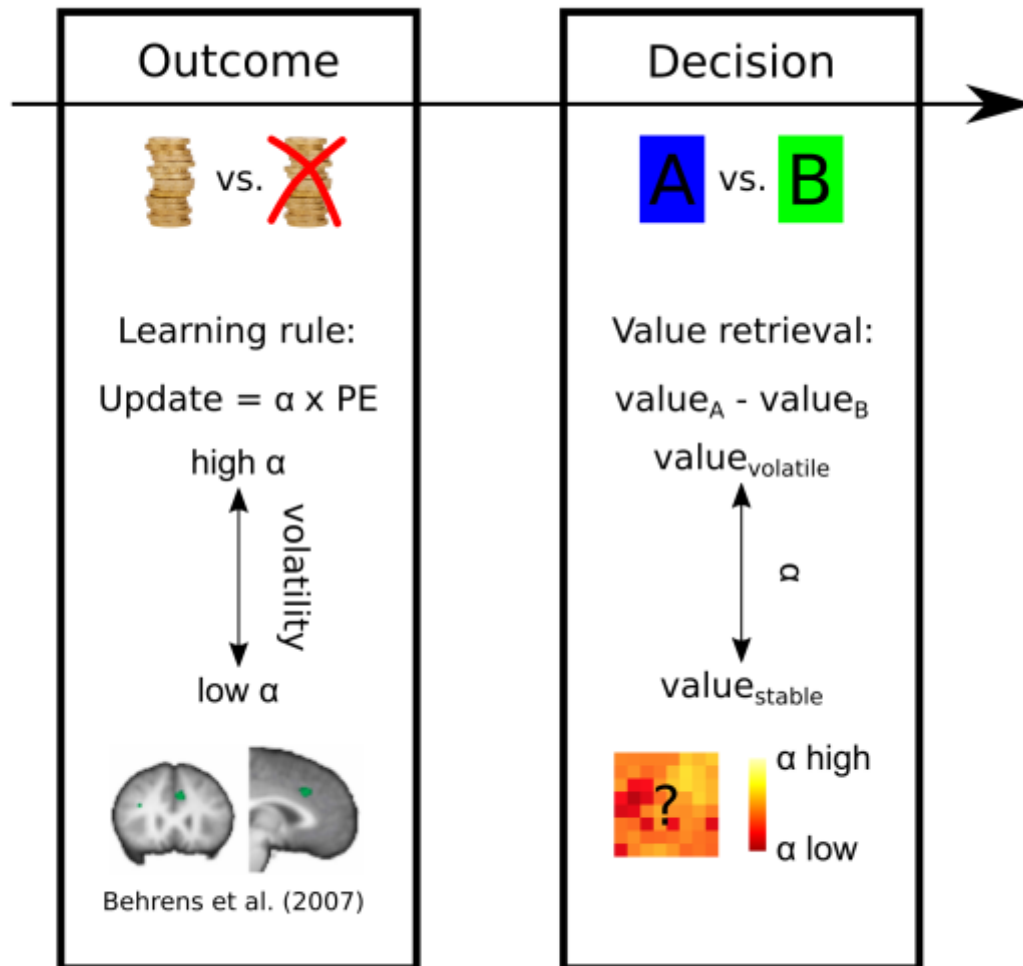

59

60 **Fig. 1. When outcomes of decisions are witnessed, average activity in dACC reflects**  
61 **the environment's volatility. Under high volatility, the options' values are updated**  
62 **with a high learning rate  $\alpha$ . However, at the time of the actual decision on the next**  
63 **trial, volatility no longer exerts a significant effect on average dACC activity.**  
64 **However, the representation of choice value estimates necessary for decision-**  
65 **making might be represented in some other way such as an anatomically**  
66 **distributed pattern of activity.**

67

68           When making decisions, the brain might first attempt to determine the  
69 best suited LR for the given environment and then calculate a single value  
70 estimate based only on this LR. If this is the case then there may be no overall  
71 change in average dACC activity but variance in dACC might best be explained by  
72 value estimates calculated at the best LR rather than other inappropriate LRs.  
73 Alternatively dACC might hold simultaneous representations of value estimates  
74 based on a broad spectrum of LRs. Although intuitively the former might seem  
75 computationally simpler, there is evidence that neurons in macaque dACC reflect  
76 recent reward experience with different time constants as might be expected if  
77 they were each employing a different LR<sup>3-5</sup>. However, the role of such neurons in  
78 behavior remains unclear. Here we sought evidence for the existence of value  
79 estimates in dACC and elsewhere in the human brain, based on experience over  
80 different time scales (and therefore employing different LRs), and examined how  
81 such representations mediate decision making (Fig. 1).

82           We developed a new approach to analyse neural data going beyond the  
83 typical use of computational models in investigation of brain behavior  
84 relationships. Typically, the free parameters of a computational model (e.g. LR)  
85 are fitted to the behavior of the subject from which trial-wise estimates of the  
86 computed variables can be extracted (e.g. value estimates). However, here we  
87 also test whether neuronal populations exist with responses that are better  
88 characterised by parts of parameter space that are not overtly expressed in  
89 current behavior. Identification of such representations is precluded by focusing  
90 exclusively on the parameters currently expressed in behavior. Here we take the  
91 approach of fitting LR values to each voxel independently, visualising those  
92 parameters over anatomical space and computing their interactions. Instead of

93 investigating where in the brain clusters of voxels express similar neural activity  
94 related to value estimates, here we examine the range of value estimates across  
95 voxels. We also examine changes to this pattern as a function of volatility.

## 96 **Results**

### 97 **Experimental Strategy**

98 We used fMRI data from 17 subjects acquired during a probabilistic reversal  
99 learning task<sup>1</sup>. Subjects repeatedly chose between two stimuli with visible  
100 reward magnitudes and hidden reward probabilities that had to be learned  
101 through feedback (Fig. 2A). Thus in this experiment subjects had to use past  
102 experience to estimate reward probabilities for each choice. Accordingly, reward  
103 magnitude estimates should be based on the stimuli displayed on each trial but  
104 the reward probability estimates should depend on recent experience over  
105 several trials. The reward probability might be estimated with different LRs  
106 depending on how quickly the environment is changing<sup>1</sup>. Each choice's value can  
107 then be derived by combining the explicit reward magnitude with the estimated  
108 probability of receiving the reward. Each session comprised two sub-sessions  
109 (order counterbalanced across subjects): one where reward probabilities  
110 remained stable and another sub-session where reward probabilities were  
111 volatile (Fig. 2B). The transition between the two sub-sessions was not  
112 announced to the subject.

113 In order to investigate whether the human brain represents multiple  
114 reward probability estimates that are based on a spectrum of LRs, we used a  
115 novel approach to analyse fMRI data. In addition to other regressors modelling

116 standard variables of interest (such as the reward magnitudes displayed to  
117 subjects on the screen, the reward received, etc) and physiological noise, we  
118 added two regressors, one modelling the estimated reward probability of the  
119 chosen option during the decision phase, another one modelling the prediction  
120 error during the outcome phase. We repeated this entire analysis 30 times for  
121 probability estimates and prediction errors based on 30 different LRs ranging  
122 from 0.01 to 0.99 (slow to fast LRs), deriving the best-fitting LR for every voxel  
123 (Fig. 2C, D, E). In other words, the 30 repetitions of the analysis make it possible  
124 to derive 30 different estimates of the reward probability based on 30 different  
125 LRs. The 30 different LRs were chosen so as to sample the entire LR space  
126 between 0.01 (almost no learning) and 0.99 (almost complete revision of value  
127 estimates on each trial) and to be equally spaced in terms of their correlation to  
128 the neighbouring regressors (Fig. 2D; Methods). In the previous study Behrens  
129 et al.<sup>1</sup> assumed one dynamic, but unitary LR generating value estimates across  
130 the brain. However, assigning a best-fitting LR to each voxel based on its own  
131 data reveals a pattern of diverse value estimates based on different time periods  
132 of experience (different LRs). The best-fitting LR of a voxel corresponds to the  
133 value regressor calculated with an LR that explained most of the variance in the  
134 voxel's time-course, compared to the other LR regressors, regardless of how  
135 much variance it actually explains. While such an approach is unlikely to capture  
136 the full range of factors affecting activity in a voxel it has the potential to identify  
137 relationships between brain activity and choice value estimates that cannot be  
138 captured with standard analysis techniques.

139

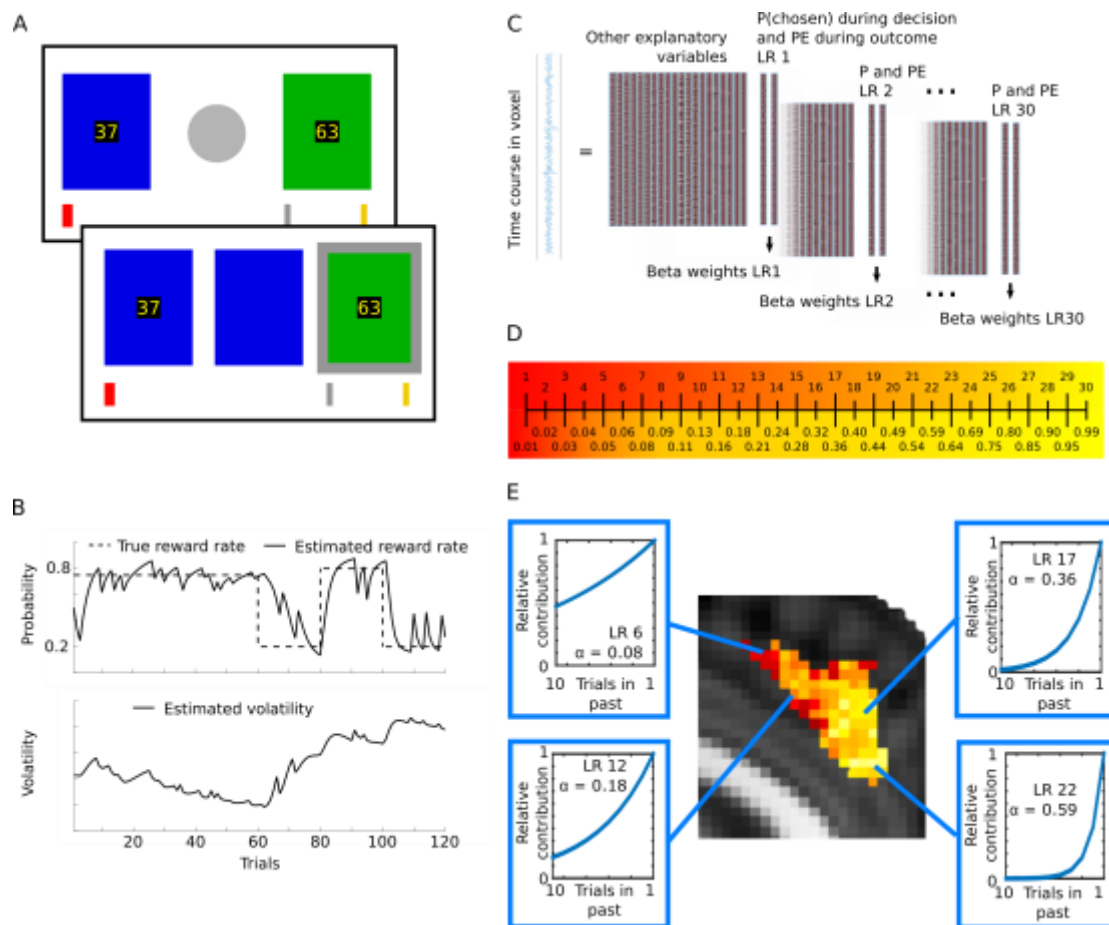

140

141 **Fig. 2. Methods and analysis. (A) Probabilistic reversal learning task. Subjects had**  
 142 **to choose between a green and a blue stimulus with different reward magnitudes**  
 143 **(displayed at the centre of each stimulus). In addition to the reward magnitude,**  
 144 **which changed randomly from trial to trial, the value of each stimulus was**  
 145 **determined by the probability of reward associated with each stimulus which**  
 146 **drifted during the course of the experiment and had to be learned from feedback.**  
 147 **After choice (here: green on second panel), the red bar moved from left to right if**  
 148 **the chosen option was rewarded. Subjects tried to reach the silver bar for £10 and**  
 149 **the gold bar for £20. (B) Example of reward probability schedule and estimated**  
 150 **volatility of the reward probability from a Bayesian learner when the stable phase**  
 151 **came first<sup>1</sup>. Each session had a stable phase of 60 trials where one stimulus was**  
 152 **rewarded 75% of trials, the other 25%, and a volatile phase with reward**  
 153 **probabilities of 80% vs. 20%, swapping every 20 trials. The order was**  
 154 **counterbalanced between subjects. (C) Analysis. As in a conventional fMRI**  
 155 **analysis, the blood-oxygen-level-dependent (BOLD) signal time course in every**  
 156 **voxel was analysed in a GLM with a design matrix containing relevant regressors.**  
 157 **Additionally, one of the regressors modelled a key component of choice value, the**  
 158 **estimated reward probability of the chosen option during the decision phase,**  
 159 **another one the prediction error during the outcome phase. The same LRs used**  
 160 **when deriving the reward probability estimates were used also for the prediction**  
 161 **error regressors (the reward probability and prediction error regressors are**  
 162 **referred to collectively as LR regressors). This analysis was repeated 30 times,**  
 163 **deriving the beta-values for probability estimates and prediction errors based on**  
 164 **30 different LRs. Thus 30 different estimates of the reward probability based on**



165 **30 different LRs were tested for their ability to explain BOLD signal variance. (D)**  
166 **With equal distance separating LRs across the LR spectrum [0.01 to 0.99] the**  
167 **regressors would be more strongly correlated at higher LRs, therefore we derived**  
168 **30 LRs with larger intervals between higher LRs, resulting in uniform correlation**  
169 **across the spectrum. (E) In an environment with high volatility, the stimulus-**  
170 **reward history should be more steeply discounted (corresponding to a higher LR)**  
171 **than in a stable environment because information from many trials ago is likely to**  
172 **be outdated. The plots in the blue boxes show the relative contribution of the**  
173 **previous trials' outcomes to the current reward probability estimation with**  
174 **different LRs. We thus derived the best-fitting LR for every voxel in every subject,**  
175 **averaging across the group. For example, within dACC the BOLD signal in some**  
176 **voxels is best explained by a low LR (red) while in others it is best explained by a**  
177 **high LR (yellow).**

178

179 We combined two approaches to define the brain areas that we  
180 investigated in detail. First, *a priori* we anatomically defined two regions of  
181 interest (ROIs) that are known to play important roles in decision-making:  
182 dACC<sup>1,6-13</sup>, and the inferior parietal lobule (IPL)<sup>14-16</sup>. The anatomical masks for  
183 dACC and IPL were taken from connectivity-based parcellation atlases<sup>17,18</sup>.  
184 Subsequently, we checked that these regions were task-relevant by looking for  
185 activity that was associated significantly with the reward magnitude of the  
186 choice taken and constrained the ROIs by the conjunction of the anatomy and  
187 task-relevant activity (Fig. 3A).

188 In order to confirm that the voxels in our ROIs reflected activity that was  
189 related to probability estimates, we ran a singular value decomposition (SVD)  
190 over the LR regressors (before HRF-convolution, normalisation and high-pass  
191 filtering) to derive singular values capturing most of the variance associated with  
192 the LR regressors. For every voxel we then derived the Akaike Information  
193 Criterion (AIC) scores from our main GLM (in the absence of any LR regressors).  
194 This reveals how well a model lacking multiple LRs accounts for activity  
195 variation in every voxel in the brain. We also ran an identical GLM that contained  
196 the same regressors but also the first three principle components from the SVD

197 (HRF-convolved, demeaned and high-pass filtered), and again computed the AIC  
198 score. This reveals how well a model containing LR-based reward probability  
199 estimates accounts for activity variation in every voxel in the brain. We then  
200 compared the AIC scores of the two models of brain activity at every voxel using  
201 random-effects Bayesian model comparison for group studies<sup>19</sup>. This procedure  
202 returned protected exceedance probabilities for every voxel, revealing the  
203 degree to which the model containing the singular values, reflecting value  
204 estimates based on one or multiple LRs, was the more likely model of the neural  
205 data (Fig. 3B). For voxels with a high exceedance probability we can state that  
206 LRs have an impact on activity. Having established initial candidate areas of  
207 interest in an unbiased way we then went on in subsequent analyses to establish  
208 more specifically *how* reward probability estimates based on different LRs were  
209 represented.  
210

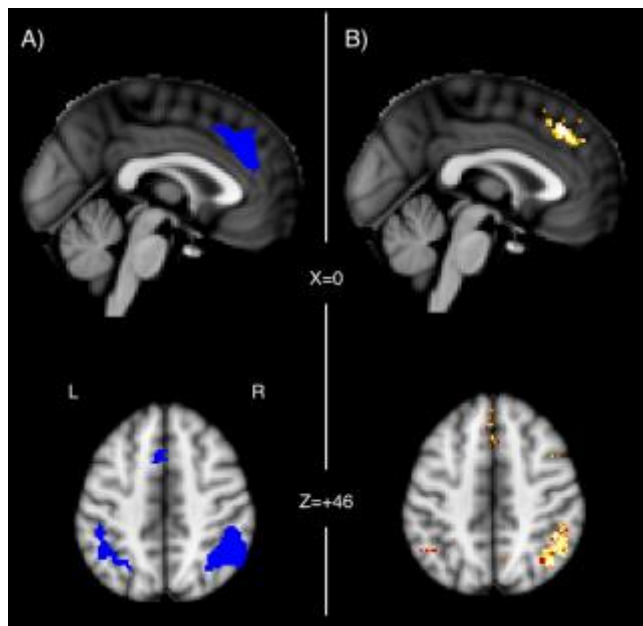

211  
212 **Fig. 3. Regions of Interest. (A) dACC and IPL regions defined by conjunction of 1)**  
213 **anatomical masks for dACC and IPL from the connectivity-based parcellation**  
214 **atlases (<http://www.rbmars.dds.nl/CBPatlases.htm>)<sup>17,18</sup> and 2) significantly**  
215 **decreasing activity (blue) associated with the magnitude of the chosen option**

216 **during decision (B) The dACC and IPL region showed high evidence for coding LRs**  
217 **(posterior exceedance probability > 0.95).**  
218

219       The relevance of the dACC and IPL regions that we had defined *a priori*  
220 based on anatomy was confirmed: these ROIs showed high evidence of coding  
221 reward probability estimates based on LRs. Accordingly, for subsequent analyses  
222 we constrained the ROI masks to those voxels that fulfilled both the anatomical  
223 and task-relevant exceedance probability criteria. We found two further clusters  
224 with high evidence in the right frontal operculum (rFO) and bilateral lateral  
225 frontopolar cortex (FPl) (Fig. S1A). We focus on reporting results for our primary  
226 regions of interest, dACC and IPL, but in the supplemental information we show  
227 related results for rFO and FPl. Using a different model, with an additional  
228 regressor coding the outcome of the trial (win or loss), the evidence in favour of  
229 an LR-based model in these regions was even stronger (Supplemental Material 2  
230 and Fig. S1B). This finding is consistent with several other demonstrations that  
231 value representations in dACC guide stay/switch or engage/explore decisions of  
232 the sort that might be used to perform the current task in humans<sup>9,20-24</sup> and  
233 other primates<sup>25,26</sup>.

## 234 **Diversity and Topography of Value Representation**

235 The high exceedance probabilities in dACC and IPL reveal that LRs have an  
236 impact on activity in these regions, but not whether different voxels represent  
237 probability estimates based on different LRs and whether there is any  
238 topographic structure in such a representation. Using our multivariate mapping  
239 approach, we found that in our ROIs, voxels did not homogeneously integrate the  
240 reward history with the same LR, but that there was some degree of spatial

241 topographic organization of the diverse probability estimates (Fig. 4). In both IPL  
242 and dACC, a significant amount of variability in the best-fitting LRs in voxels was  
243 explained by the x, y, and z coordinates of the voxel when regression models  
244 were fitted to each subject's data (t-test over the variance explained by every  
245 subject's regression model ( $r^2$ ) against the mean  $r^2$  of 10,000 regression models  
246 with randomly permuted coordinates. dACC: Mean  $r^2$  true data = 0.101, mean  $r^2$   
247 permuted data = 0.002,  $t_{16} = 5.071$ ,  $p < 0.001$ , IPL right hemisphere: Mean  $r^2$  true  
248 data = 0.124, mean  $r^2$  permuted data = 0.003,  $t_{16} = 5.566$ ,  $p < 0.001$ , IPL left  
249 hemisphere: Mean  $r^2$  true data = 0.182, mean  $r^2$  permuted data = 0.006,  $t_{16} =$   
250 5.040,  $p < 0.001$ ). The principle axis of anatomical organization in dACC in  
251 humans and other primates is approximately rostrocaudally oriented<sup>18,27</sup>.  
252 Although this axis does not fully correspond to the cardinal axes in the standard  
253 space for illustrating neuroimaging data (Montreal Neurological Institute [MNI]  
254 space) we nevertheless examined whether LRs were also organized along the  
255 MNI y-axis. Consistently, across subjects, in the dACC, LRs showed a gradient  
256 along the MNI y-axis with increasing LRs in the rostral direction (t-test of  
257 subjects' regression coefficients of the y-coordinate regressor against 0,  $t_{16} =$   
258 2.175,  $p = 0.045$ ). No major direction of anatomical organization has been  
259 reported for the IPL.

260 Previous studies have suggested that some brain regions may reflect a  
261 particular time scale of experience or LR that is appropriate to its function<sup>28</sup> but  
262 our analysis suggests dACC and IPL are, in addition, representing a spectrum of  
263 different LRs. Other relatively abstract features, such as numerosity are known  
264 to be represented topographically even though such representations do not map  
265 onto sensory receptors or motor effectors in any simple manner<sup>29</sup>. The

266 distribution of LRs in dACC might approximately be related to the rostral-to-  
267 caudal gradient in its connectivity with limbic versus motor areas<sup>30</sup>.

268

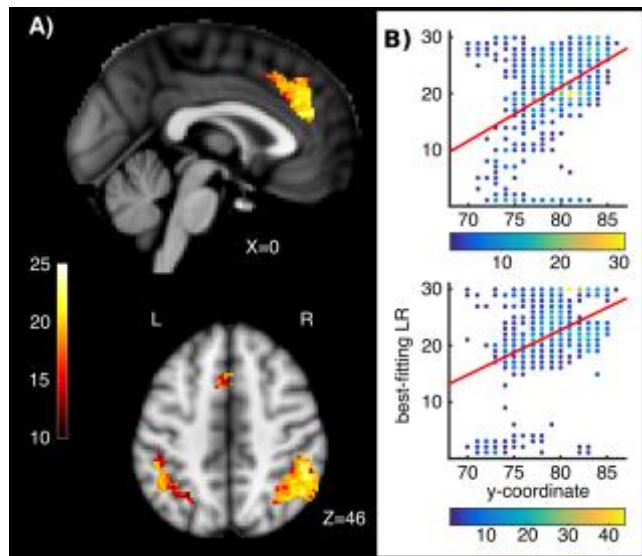

269

270 **Fig. 4. Topographic maps of LRs. (A)** A topography of diverse estimates of the  
271 reward probability based on different LRs exists in the ROIs. Bright yellow and  
272 white colors indicate voxels with high LRs while darker, redder voxels indicate  
273 voxels with lower LRs. The color bar on the left indicates the set of LRs (high LRs  
274 at top, low LRs at bottom) chosen in 30 steps to minimize correlation between  
275 regressors in LR space (see also figure 2d). **(B)** Spatial gradient along the rostro-  
276 caudal axis in dACC in two example subjects. Each voxel's best-fitting LR is plotted  
277 against its position on the y-coordinate. The color of the dots reflects the number  
278 of voxels having a given combination of values (see color bars beneath graph).  
279 Red lines: Regression of all voxels' best-fitting LR against their y-coordinate.  
280

## 281 Mechanisms of Adaption to Changes in the Environment

282 As already explained, in a volatile environment, ideally decisions should be based  
283 on probability estimates derived from voxels with higher LRs, while in a stable  
284 environment, voxels with lower LRs might inform the decision. This suggests  
285 that one of two changes to the representation might occur as volatility of the  
286 reward environment changed. First, voxels might have dynamically changing  
287 LRs, depending on the environment (Fig. 5A). Alternatively, each voxel might  
288 retain its best-fitting LR regardless of volatility but the degree to which variance

289 in each voxel's activity was explained by reward probability estimates with the  
290 best-fitting LR might get stronger in high LR voxels in volatile environment (or  
291 stronger in low LR voxels in stable environments). In other words, the regressor  
292 effect size (beta-weight) in high LR and low LR voxels might increase and  
293 decrease in volatile and stable environments respectively (Fig. 5B). To probe  
294 these hypotheses, we split the BOLD signal time course into stable and volatile  
295 sub-sessions and again identified the best-fitting LR for every voxel in each of the  
296 two sub-sessions. We then compared the best-fitting LR in each sub-session in  
297 every voxel.

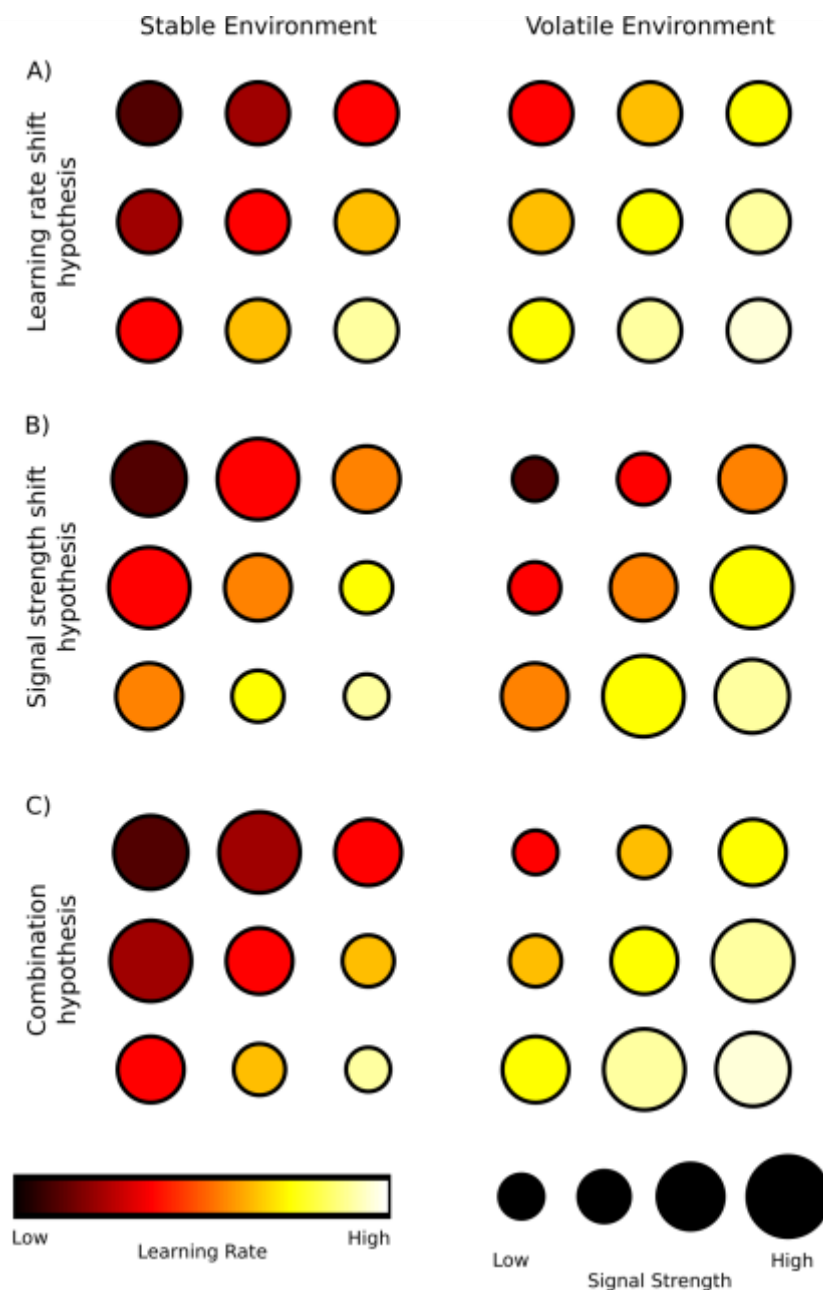

298

299 **Fig. 5. Schematic figure depicting possible ways in which multiple value estimates,**  
 300 **based on different periods of experience determined by different LRs, might be**  
 301 **represented in the brain as indexed by fMRI. We consider how such**  
 302 **representations might change as the environment's volatility changes. Each row**  
 303 **shows the representation of value estimates in nine example voxels in a stable**  
 304 **and in a volatile environment. A) According to the LR shift hypothesis, in a stable**  
 305 **environment neurons in more voxels would compute value estimates based on**  
 306 **lower LRs while they would shift towards higher LRs in a volatile environment. B)**  
 307 **The signal strength shift hypothesis predicts that the value estimates computed**  
 308 **by the neurons of each voxel remain constant in all environments, but that those**  
 309 **voxels with value estimates that are currently most relevant for the environment**  
 310 **(high LR voxels in volatile environments and low LR voxels in stable**  
 311 **environments) increase their signal strength. C) The combination hypothesis**  
 312 **suggests a combination of the two mechanisms in A) and B).**

313

314 In the dACC and IPL, the LRs of the voxels' probability estimates were  
315 approximately normally distributed (Lilliefors test: dACC  $p=0.363$ ; IPL  $p=0.950$ )  
316 but they had significantly higher LRs in the volatile compared to the stable sub-  
317 session (average LR difference in dACC: 5.36 [details of LR scaling are shown in  
318 Fig. 2D], t-test of each subject's mean change in LR's against 0:  $t_{16} = 3.68$ ,  
319  $p=0.002$ , average LR difference in IPL: 4.34,  $t_{16} = 2.58$ ,  $p=0.020$ ) (Fig. 6). This  
320 finding suggests an adaptation mechanism resembling the one outlined in the  
321 shift-hypothesis (Fig. 5A). However, there might also be a change in how much of  
322 the neural activity in a voxel can be explained by the best-fitting LR. This would  
323 constitute a change in the effect size or beta-weight of the best fitting regressor  
324 (Fig. 5B,C).

325

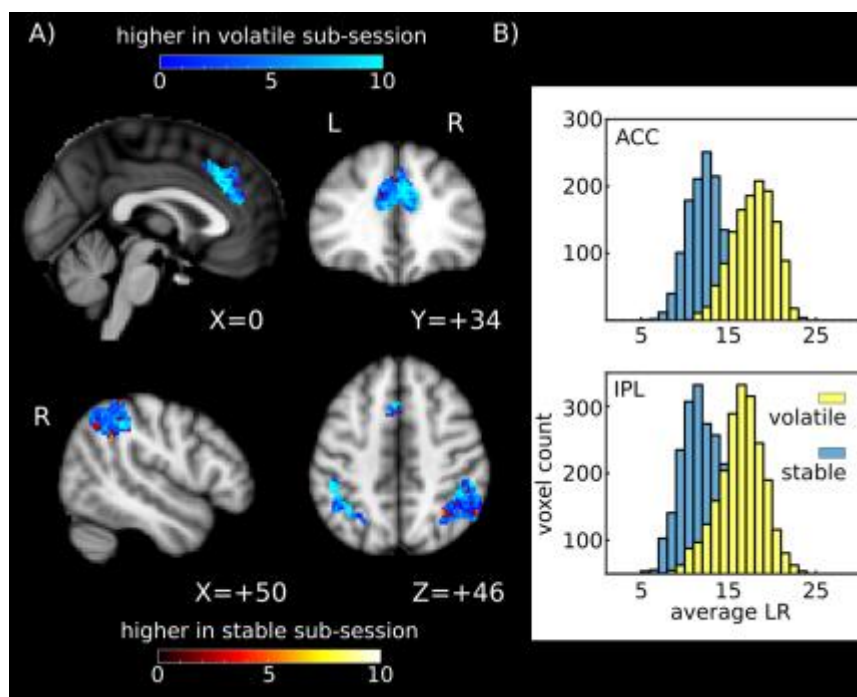

326

327 **Fig. 6. Dynamic changes in LR between stable and volatile sub-session. A) Change**  
328 **in LR in every voxel between stable and volatile sub-session. Values on the color**  
329 **bars show the change in LR rank. B) Distribution of number of voxels with best-**  
330 **fitting LRs in the two regions of interest.**



331

332           We therefore tested whether there was a dynamic change in the effect  
333 sizes of the best-fitting LRs depending on which LRs were currently behaviorally  
334 relevant. If such a boosting of relevant LR signals exists, then we would expect  
335 voxels with lower best-fitting LRs to have higher beta-weights in the stable sub-  
336 session (a negative correlation between best-fitting LR and beta-weight) and  
337 voxels with higher best-fitting LRs to having the higher beta-values in the  
338 volatile session (positive correlation between best-fitting LR and beta-weight).  
339 We calculated the correlation between best-fitting LR and beta-weights for every  
340 subject in the two sub-sessions and transformed the correlation coefficients to z-  
341 scores (Fisher transformation). In the dACC, there was indeed such a dynamic  
342 change in effect size (mean difference in z-scores stable minus volatile sub-  
343 session  $-0.230$ ,  $t_{16} = -3.802$ ,  $p = 0.002$ ), while this was not the case for the IPL  
344 (mean difference  $-0.056$ ,  $t_{16} = -0.818$ ,  $p = 0.425$ .) (Fig. 7). This shows that in the  
345 dACC, there is a combined adaptation of both the best-fitting LRs in voxels and a  
346 change in the effect size of the best-fitting LR, depending on the behavioral  
347 relevance of the best-fitting LR in a given environment (Fig. 5C). Thus, voxels  
348 change so as to code LRs appropriate for the current environment and they  
349 change so as to encode appropriate LRs more strongly than inappropriate LRs. In  
350 the IPL, however, only the former adaptation to the environment seems to take  
351 place (Fig. 5A).

352

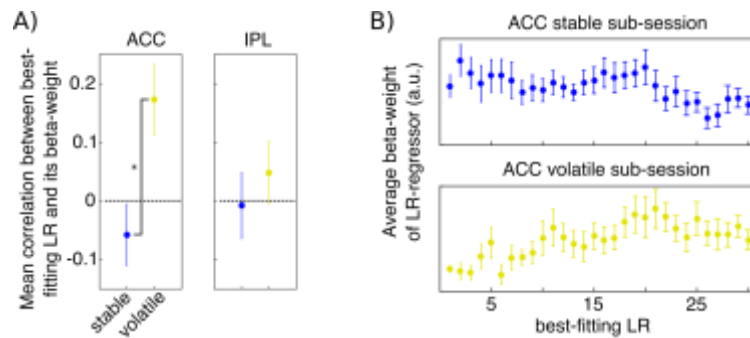

353

354 **Fig. 7. Change in the correlation between beta-weights of the best-fitting LR**  
355 **regressors and the best-fitting LR between sub-sessions. A) In the dACC, the**  
356 **correlation was significantly positive for the volatile sub-session and significantly**  
357 **different from the negative correlation seen in the stable phase. B) Average beta-**  
358 **weights across the whole spectrum of LRs in stable and volatile sub-session in the**  
359 **dACC.**

### 360 **LRs as Organizational Principle of Interregional Interaction**

361 So far we have seen that four brain regions carry multiple estimates of the value  
362 of choices that are based on different time constants of experience  
363 corresponding to different LRs. Thus, multiple LRs constitute an organizing  
364 principle determining distribution of activity patterns within these areas. We  
365 therefore next asked whether multiple LRs exerted a similar influence over the  
366 manner in which the areas interacted with one another. In other words, do  
367 voxels that code recent reward probability experience with a small time constant  
368 (high LR) in one brain region (e.g. dACC) interact preferentially with voxels with  
369 high LRs elsewhere? Similarly, are low LR voxels in different brain areas  
370 preferentially interacting with one another?

371 For every subject, we extracted the mean residual BOLD time course for  
372 all voxels after regressing out all the information contained in our original design  
373 matrix (coding, for example, for the various task events) and additionally all 30  
374 LR regressors indexing the estimated reward probability in the decision phase  
375 and all 30 LR regressors indexing prediction error in the outcome phase. Thus,

376 the residual time course no longer contained any LR related information. We  
377 then created a mean residual time course for all voxels originally identified as  
378 being of the same LR within each ROI and correlated these 30 mean residual  
379 time courses with the 30 mean residual time courses of another region. We  
380 found that the more similar the best-fitting LRs, the higher was the correlation of  
381 these voxels' residual time courses between the dACC and the IPL, as reflected in  
382 higher average correlation values along the diagonal (Fig. 8). For example, voxels  
383 with high LRs in the dACC were more correlated with high-LR voxels compared  
384 to low-LR voxels in the IPL (Fig. 8; bright yellow diagonal line running from top  
385 left to bottom right).

386 The statistical test for demonstrating the significance of the effect is best  
387 understood with reference to figure 8. It is to examine whether the subjects' z-  
388 transformed correlation coefficients are correlated positively with their  
389 closeness to the diagonal; this was indeed the case (negative Euclidian distance,  
390 one-tailed t-test of z-transformed correlation values  $t_{16} = -2.944$ ,  $p = 0.005$ ); the  
391 correlation between the brain areas' signals became greater the more that the  
392 signals were drawn from voxels with similar LRs.

393

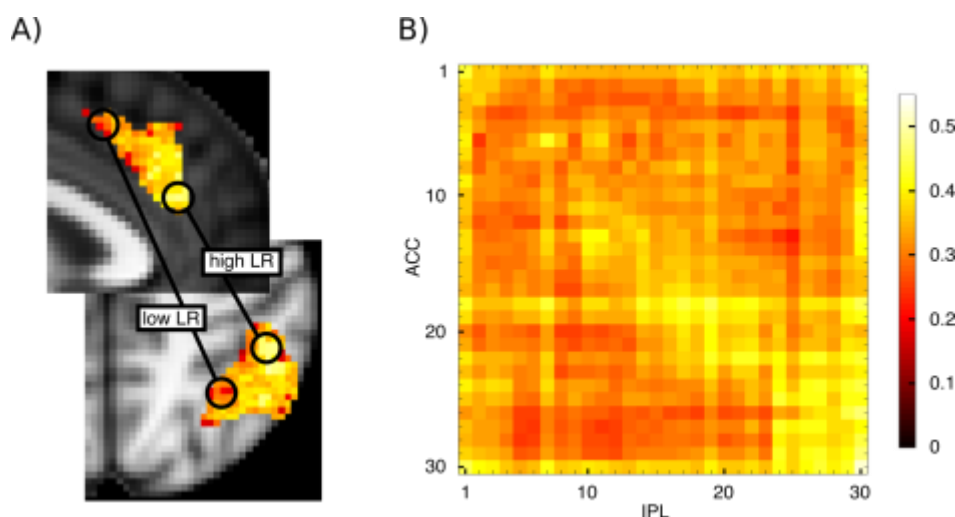

394

395 **Fig. 8. LR topography as an organizing principle for interaction between regions.**  
396 **A) We investigated whether voxels that represent choice values with similar LRs**  
397 **also show stronger connectivity between regions. B) Correlation plot depicting**  
398 **the correlation of the residual BOLD time course averaged over all voxels with the**  
399 **same best-fitting LR within dACC with the residual BOLD time course over all**  
400 **voxels with the same best-fitting LR within IPL, averaged over all subjects. The**  
401 **subjects' z-transformed correlation coefficients were correlated positively with**  
402 **their closeness to the diagonal.**

403

404 In summary, even after removing all linear task-related information  
405 (activity linearly related to task variables and value estimates), voxels with the  
406 same best-fitting LR shared a more similar pattern of activity in dACC and IPL.  
407 Thus, LRs are not just an organizational feature of individual brain regions but  
408 also an organizing principle determining how these regions interact with one  
409 another. This feature of interactions between areas was also apparent in all  
410 combinations of interactions between all the four regions that showed high  
411 evidence for the coding of reward probabilities based on multiple LRs (ACC, IPL,  
412 FPI and rFO; Fig. S6, Table S1).

### 413 **Ubiquity or Localization of Dynamic Topographic Value Representations**

414 We have presented evidence for topographic organization of value estimates as a  
415 function of different LRs and shown LRs are an organizational principle of  
416 connectivity between regions such as dACC and IPL. We next asked whether such  
417 representations and interaction patterns are ubiquitous in all brain areas  
418 signalling value. We therefore performed the same analyses in another brain  
419 region that has repeatedly been linked to value and decision making, the

420 ventromedial prefrontal cortex (vmPFC)<sup>9,14,31-37</sup>. In most studies, the strongest  
421 value-related activation was found in the anterior part of the vmPFC. We  
422 examined two vmPFC regions: anterior vmPFC and posterior vmPFC  
423 (Supplemental Materials 3). We found some, albeit weak, evidence for LR related  
424 activity in anterior vmPFC (Fig. S1C). Unlike in dACC and IPL, in vmPFC the  
425 amount of BOLD variance explained by SVD-derived singular values reflecting  
426 the LR regressors was not significantly greater than the amount of variance  
427 explained by a model lacking LR information. In fact, when the same statistical  
428 approaches were used as in our investigation of dACC and IPL we found that  
429 activity in many voxels in vmPFC was better explained by a model lacking the LR  
430 regressors. Value estimates with different LRs could be fit to voxels in vmPFC  
431 (Fig. S2) but there was no shift in the distribution of LRs depending on the  
432 volatility of the environment (Fig. S3, compare to Fig. 6) and there was no change  
433 in the correlation between the best-fitting LR and its beta-weight as seen in the  
434 dACC (Fig. S3, compare to Fig. 7) in either vmPFC region. Additionally, unlike  
435 dACC, IPL, rFO, and FPI, there was no evidence that voxels in either vmPFC  
436 region preferentially interacted with voxels with similar LRs in other brain  
437 regions (i.e., no diagonal with high correlation values; Supplemental Materials 5;  
438 Fig. S5, Table S1, compare to Fig. 8). In general, the average correlation over all  
439 voxels between two regions was significantly higher for dACC, IPL, rFO, and FPI  
440 than between any of these areas and either vmPFC subdivision (Table S2).

441 In summary, there is only comparatively weak evidence for the vmPFC  
442 holding value related information that reflects recent experience of reward  
443 probability and the value estimates it held were not as sensitive to  
444 environmental volatility. Thus, the neuroanatomical gradients of probability

445 estimates calculated with different LRs in dACC and IPL, their sensitivity to  
446 environmental volatility, and their inter-regional LR-specific connectivity are not  
447 ubiquitous features of all value encoding brain regions. This supports the notion  
448 that the spectrum of value estimates based on multiple LRs that we find in some  
449 brain regions cannot be attributed to noise over subjects, time, or voxels.

450

#### 451 **LR-based representation at decision outcome**

452 Finally, while the current investigation is focussed on the decision-making  
453 process, rather than the outcome monitoring phase of the task, we wanted to  
454 know whether we could observe comparable dynamic adaptations to  
455 environmental volatility during the outcome phase. We therefore investigated  
456 whether prediction error coding in ventral striatum (VS) would also reflect  
457 adaptations of which LRs should be expressed as a function of volatility. A model  
458 containing the first three singular values from an SVD over the prediction error  
459 regressors provided a good model of right VS activity during the outcome phase  
460 of the trials (Fig. S6A). However, using a bilateral anatomical mask of the VS  
461 (Automated Anatomical Labeling (AAL) atlas<sup>38</sup>), the distributions of the LRs  
462 generating the prediction error were stable and did not change between the  
463 stable and volatile sub-sessions (Supplemental Materials 6; Fig. S6B). While  
464 Behrens et al.<sup>1</sup> found an overall change in dACC activity during outcome, there  
465 was no evidence in the current study for a prediction error signal in dACC, using  
466 either standard analysis procedure similar to those used before<sup>1</sup> nor based on  
467 Bayesian group model comparisons such as those employed here.

## 468 Discussion

469 A number of cortical regions have been implicated in reward-guided decision  
470 making and it is possible that they operate partly in parallel<sup>12,31</sup>. For example,  
471 some aspects of decision making behavior are predicted by activity in vmPFC  
472 while others, even in the same task and at the same time, are better predicted by  
473 activity in the intraparietal sulcus<sup>31</sup>.

474         DACC may be particularly important when deciding whether to switch  
475 and change between choices and behavioral strategies<sup>9,10,12,20-26</sup>. A flexible  
476 behavioral repertoire would be promoted by having multiple experience  
477 dependent value estimates, estimated over different time scales: representations  
478 of how well things have been recently and, simultaneously, how well they have  
479 been over the longer term. By contrasting the strength of such representations a  
480 decision-maker would be able to know whether the value of their environment is  
481 stable or improving or whether it is declining and that it might be time to explore  
482 elsewhere<sup>24</sup>.

483         In the present study we have found evidence that indeed multiple value  
484 representations, with different time constants, are especially prominent in dACC  
485 and IPL. A diversity of value estimates based on a spectrum of LRs could either  
486 reflect features of the neural representation guiding decision making, or it might  
487 simply be a reflection of natural variability over samples, trials, and voxels.  
488 Several aspects of our findings suggest that they reflect features of neural  
489 activity rather than noise. First, multiple LR-based representations were not  
490 ubiquitous; they were prominent in only a subset of regions implicated in value  
491 representation and decision making (Supplemental Materials 3-5; Figs. S1-S5).

492 Second, the multiple LR representations were structured; they were  
493 topographically organized within areas (Fig. 4) and they were an organizing  
494 feature of interaction patterns between areas (Fig. 8). The conclusion that there  
495 are multiple LR-based value estimates is derived from averaging data over trials;  
496 in the future it might be interesting to examine the nature of these  
497 representations on a trial-by-trial basis.

498 While the parallel information processing entailed by such a  
499 representation might appear an unnecessary waste of computational resources,  
500 it may be advantageous when the volatility of the environment is changing and  
501 other LRs generate better value estimates than the one currently employed to  
502 guide behaviour. Imagine a decision-maker that has estimated that the current  
503 environment is volatile and estimates choice values only on the basis of recent  
504 experience (high LR). If the decision-maker realises that actually the  
505 environment is more stable than suspected, then it needs to retrieve the  
506 outcomes of earlier decisions and reweigh each of them according to the LR that  
507 is now optimal for estimating choice values. Our evidence suggests that the brain  
508 may compute many values estimates in parallel over different time scales and  
509 that such longer term time scale estimates (lower LR estimates) are immediately  
510 available for the decision-maker to switch to on realising the true level of  
511 environmental volatility. Since these value estimates are derived in a Markov  
512 decision process, only the most recent value estimate has to be remembered and  
513 updated so that it is not necessary to remember preceding outcomes.

514 The co-existence of multiple experience dependent value estimates guiding  
515 decisions is also consistent with the results of single unit recordings made in  
516 macaques<sup>3</sup> in a dACC region homologous with the one we investigated here<sup>18</sup>.



517 Neurons that varied in the degree to which their activity reflected just recent  
518 outcomes or also outcomes in the more distant past were also reported in the  
519 intraparietal sulcus and dorsolateral prefrontal cortex<sup>3</sup>. In the present study we  
520 also found evidence for such response patterns in fMRI activity in an adjacent  
521 part of the parietal cortex (IPL), a very rostral part of prefrontal cortex (FPI), and  
522 in FO. By recording activity in individual neurons it is possible to demonstrate  
523 precisely how different neurons, even closely situated ones, can code both recent  
524 and more distant rewards with different weights. In our study, however, by  
525 manipulating the reward environment that subjects experienced in volatile and  
526 stable sub-sessions, it was possible to show how such experience dependent  
527 reward representations changed with environment and behavior.

528       The evidence for value learning using multiple LRs in several cortical areas  
529 fits well with the idea that there exists a hierarchy of information accumulation  
530 from short time scales in sensory areas to long time scales in prefrontal, dACC,  
531 and parietal association areas<sup>39-43</sup>. In reinforcement learning, information  
532 obtained many trials ago in the past can still influence probability estimates  
533 when LRs are low. In our task, with an average trial duration of 20s<sup>1</sup>, information  
534 from several minutes ago has to be remembered. However, we can also show  
535 that even within a single area, there are gradients of time scale representation  
536 and that these representations are not fixed, but dynamically responding to the  
537 environment.

538       In situations in which dACC value representations guide behavior there are  
539 often also value-related activations in FPI and IPL<sup>10,11,14,44,45</sup>. Typically, these  
540 areas differ from others such as vmPFC in that they encode the value of  
541 behavioral change and exploration. In addition, in the present experiment we

542 were able to show that there are links between the value representations in  
543 dACC and other brain regions. This suggests that multiple value representations  
544 of recent experience constitute an organizing feature of inter-areal interaction. It  
545 is not just that average activity throughout one region is related to the average  
546 activity of another. Instead parts of dACC employing the fastest and slowest LRs  
547 are interacting with corresponding subdivisions of FPI, IPL, and rOP. The pattern  
548 of results is suggestive of a distributed representation across multiple brain  
549 regions in which the value of initiating and changing behavior is evaluated over  
550 multiple time scales simultaneously<sup>46</sup>.

551 In a longer behavioral testing session (without fMRI acquisition) it was  
552 shown that subjects do adapt their LR in response to changes in the volatility of  
553 the environment<sup>1</sup>. The change in best-fitting LRs that we observe between the  
554 stable and the volatile sub-session is in accordance with just such a shift in  
555 behavior. The exact mechanism by which the broad spectrum of LR parameters  
556 present in dACC, concerning many possible choice values estimated at different  
557 time scales, is integrated into one eventual decision needs further elucidation.

558 In conclusion, there are multiple experience dependent value estimates with  
559 coarse but systematic topographies in dACC and three other regions. Interactions  
560 between these regions occur in relation to this pattern of specific time scales.  
561 The distributions of value estimates are dynamically adjusted when there are  
562 changes in the environment's volatility. Dynamic adjustment based on  
563 environmental statistics might be critical for adjusting behavior to a particular  
564 LR and for selecting a particular choice on a given trial.

## 565 **Experimental Procedures**

566 The behavioral task and scanning procedures have been described in detail  
567 before<sup>1</sup>. In the task, subjects were presented with two choice options, a green  
568 and a blue rectangle (Fig. 2A). The potential reward magnitudes were presented  
569 in the centre of each stimulus while the reward probabilities had to be learned  
570 by the subjects. Reward probabilities were changing throughout the experiment.  
571 There was a stable sub-session of 60 trials where one of the stimuli was  
572 rewarded 75% of trials and the other one 25% and a volatile sub-session where  
573 reward probabilities for the stimuli were 80% and 20%, changing every 20 trials.  
574 The order of the sub-sessions was counterbalanced between subjects. Reward  
575 information was coupled between the stimuli, i.e. the feedback that the chosen  
576 stimulus was rewarded also implied that the choice of the other stimulus would  
577 not have led to a reward, and *vice versa*. If the chosen stimulus was rewarded, the  
578 presented reward magnitude was added to the subjects accumulating points and  
579 a red bar at the bottom of the screen increased in proportion to the points  
580 acquired. When the red bar reached a vertical silver bar, subjects received £10, if  
581 it reached a golden bar, they receive £20 at the end of the experiment. Subjects  
582 were presented with the two options for 4-8 s (jittered). When a question-mark  
583 appeared, they could signal their choice with a button press. As soon as the  
584 button press was registered, subjects had to wait for 4-8 s (jittered) until the  
585 rewarded stimulus was presented in the middle. After a jittered inter-trial-  
586 interval of 3-7 s, the next trial began. EPI images were acquired at 3 mm<sup>3</sup> voxel  
587 resolution with a repetition time (TR) of 3.0 s and an echo time (TE) of 30 ms, a  
588 flip angle of 87°. The slice angle was set to 15° and a local z-shim was applied

589 around the orbitofrontal cortex in order to reduce signal drop-out<sup>1</sup>. Since the  
590 response was self-timed, the experiment's duration was variable. On average,  
591 830 volumes (41.5 min) were acquired. A T1 structural image was acquired with  
592 an MPRAGE sequence with 1mm<sup>3</sup> voxel resolution, a TE of 4.53 ms, an inversion  
593 time(TI) of 900 ms and a TR of 2.2 s<sup>1</sup>.

594 We used FMRIB's Software Library (FSL)<sup>47</sup> for image pre-processing  
595 and the first level data analysis (see Supplemental Materials 1). Subsequent  
596 analysis steps relating to the LR regressors were performed with MATLAB  
597 (R2015a 8.5.0.197613).

598 The preprocessing was performed on the functional images of the entire  
599 session (for the initial analysis), and of the stable and the volatile sub-sessions  
600 (for subsequent analyses). In order to analyse the sub-sessions, we split the time  
601 series of BOLD data into those portions that were collected when the reward  
602 environment was in a stable or volatile sub-session. The data assigned to the first  
603 sub-session encompassed all MRI volumes collected up to and including the  
604 onset of the last outcome of that sub-session of the experiment plus two  
605 additional volumes to account for the delay of the hemodynamic response  
606 function.

607 The data were pre-whitened before analysis to account for temporal  
608 autocorrelation<sup>48</sup>. For the subsequent mapping of LRs, we ran three GLM's for  
609 the whole session, and separately for the stable and the volatile sub-sessions, at  
610 the first level for each participant with the following regressors:

- 611 1) Decision phase main effect (duration: stimuli onset until response)
- 612 2) Predict phase main effect (duration: response until outcome)
- 613 3) Outcome monitor phase main effect (duration: 3s)

614 4) Parametric modulation of decision phase with reward magnitude of  
615 chosen stimulus

616 5) Parametric modulation of decision phase with log of reaction time

617 6) Parametric modulation of decision phase with stay (0) or switch (1)  
618 decision

619 7) Parametric modulation of outcome monitor phase with the reward  
620 magnitude of the chosen stimulus

621 We also added the temporal derivative of each regressor to the design matrix in  
622 order to explain variance related to possible differences in the timing between  
623 the assumed and the actual hemodynamic response function (HRF).

624 Since reward magnitudes are changing unpredictably, participants  
625 estimate reward probabilities and not action values. Thus, for each subject, we  
626 then calculated the probability estimates for each stimulus from a simple  
627 reinforcement learning model<sup>49</sup>, based on all 99 LRs ( $\alpha$ ) between 0.01 and 0.99.  
628 The model estimates the probability of one of the stimuli leading to a reward by  
629 updating the stimulus-reward probability  $p(a)$  with LR  $\alpha$ , where  $R = 1$  when the  
630 stimulus was rewarded and  $R = 0$  if not:

631

$$632 \quad p(a_i) = p(a_{i-1}) + \alpha[R - p(a_{i-1})]$$

633

634 The probability estimate of the other stimulus  $p(B)$  is  $1 - p(A)$ . From these  
635 values, we also calculated the prediction error (PE) corresponding to the  
636 outcome of that trial by subtracting the probability estimate of the chosen  
637 stimulus from the outcome (1 for rewarded trials, 0 for non-rewarded trials).

638 Thus, the PE is a “probability PE” that is not weighted with the magnitude of the

639 (foregone) reward. After normalising the probability estimates for all LRs for  
640 both stimuli, we derived the probability estimate of the chosen stimulus  
641  $p(\text{chosen})$ . These  $p(\text{chosen})$ -regressors (hereafter “LR regressors”) and the PE  
642 regressors were convolved with the HRF, normalised and high-pass filtered in  
643 the same way (in the same manner as in FSL). We calculated a correlation matrix  
644 for the 99 resulting LR regressors for every subject and for the whole session as  
645 well as the two sub-sessions. Since the correlation between regressors is not the  
646 same for all levels of LR, we chose 30 regressors that were equally spaced in  
647 terms of their correlation to the neighbouring regressors. We did so by averaging  
648 the 30 LR regressors with equal correlation for every subject in all three sessions  
649 and subsequently rounding them to two decimals. This procedure resulted in 30  
650 LR regressors corresponding to the following LRs (see also Fig. 2):

651 [0.01 0.02 0.03 0.04 0.05 0.06 0.07 0.08 0.09 0.11 0.12 0.14 0.15 0.17 0.20 0.22  
652 0.25 0.28 0.32 0.36 0.40 0.46 0.51 0.57 0.64 0.71 0.78 0.85 0.93 0.99].

653 We used the BET procedure<sup>50</sup> on the high-pass filtered and motion corrected  
654 functional MRI data to separate brain matter from non-brain matter. For each of  
655 the (sub-)sessions in every subject, we explained activity in the filtered fMRI  
656 data with 30 separate GLM's, each with the design matrix described above  
657 together with one of the 30 LR regressors (onset during the decision phase) and  
658 the corresponding PE regressor (onset during outcome monitoring phase).

659 In each GLM, we retrieved the parameter estimate for the LR regressor and  
660 we mapped the following three measures to every voxel in the brain:

661 1) best-fitting LR: the regressor with the highest beta-value (regression  
662 weights indicative of the relationship between the regressor and the  
663 BOLD signal) in the GLM. For example, if regressor 20 had the highest

664 beta-values amongst the 30 LR regressors, that voxel would be assigned a  
665 LR of 20.

666 2) the change in the best-fitting LR between the stable and the volatile sub-  
667 sessions (measured as best-fitting LR in the stable sub-session minus the  
668 best-fitting LR in the volatile sub-session).

669 3) the beta-weight of the best-fitting LR regressor in the entire session and  
670 in the stable and the volatile sub-sessions

671 The resulting images were registered to MNI-space using the non-linear  
672 warping field using nearest-neighbour interpolation. Subsequently, the single-  
673 subject images were averaged across all subjects to create group-average  
674 images.

675 We also used a standard FSL analysis with a GLM similar to the one above but  
676 with two additional regressors corresponding to the probability of the chosen  
677 stimulus during the decision phase and during the outcome monitoring phase as  
678 derived from a Bayesian learner model<sup>1</sup> as well as a regressor coding the  
679 outcome of the trial (won or lost). This analysis was used for retrieving the beta-  
680 weight of the magnitude of the chosen option's potential reward of each voxel for  
681 the correlation analysis with the best-fitting LR regressor's beta-weight.

682 The magnitude regressor was also used for generating regions of interest  
683 (ROIs; Fig. 3). We defined our ROIs by the overlap of the contrast over this  
684 regressor (cluster-corrected results with the standard threshold of  $z=2.3$ ,  
685 corrected significance level  $p=0.05$ ) and anatomical masks derived from the  
686 connectivity-based parcellation atlases<sup>17,18</sup>  
687 (<http://www.rbmars.dds.nl/CBAtlases.htm>) (Fig. 3). For dACC, this included  
688 bilateral areas 24a/b, d32 as well as the bilateral anterior rostral zones of the

689 cingulate motor areas. For posterior vmPFC, this included bilateral area 14m and  
690 for anterior vmPFC it included 11m<sup>18</sup>. For IPL, this included inferior parietal  
691 lobule areas c and d as defined by Mars and colleagues<sup>17</sup>. The atlas only contains  
692 IPL regions for the right hemisphere, we therefore mirrored the regions along  
693 the midline to create masks for the left hemisphere. Since the anatomical masks  
694 are defined by white matter connectivity, they do not cover the entire cortical  
695 area. Therefore, the dACC and vmPFC masks were extended with 2 voxels  
696 medially, while the IPL masks were extended laterally and caudally to ensure  
697 that all grey matter voxels were covered by the masks.

#### 698 **Evidence for variability in voxels' activity related to reinforcement learning**

699 In order to confirm that the voxels in our ROIs actually reflected activity that was  
700 related to probability estimates, we ran a singular value decomposition (SVD)  
701 over the 99 LR regressors (before HRF-convolution, normalisation and high-pass  
702 filtering) to derive singular values capturing most of the variance associated with  
703 the variability in the 99 LR regressors. For every voxel we then derived the  
704 Akaike Information Criterion (AIC) scores from our main GLM (not containing  
705 any LR regressors) as well as from a GLM that contained the first three singular  
706 values from the SVD (HRF-convolved, demeaned and high-pass filtered). We then  
707 used random-effects Bayesian model comparison for group studies<sup>19</sup> by passing  
708 each subject's AIC scores for the two models to the `spm_bms` matlab function  
709 from SPM12 (<http://www.fil.ion.ucl.ac.uk/spm/software/spm12/>). This  
710 procedure returned protected exceedance probabilities for every voxel, showing  
711 the probability that the model containing the singular values was a more likely  
712 model of the data than the model without those components.



## 713 **Author Contributions**

714 D.M. and L.V. analysed data; T.E.J.B. acquired the data; D.M., K.H.M., O.J.H., N.K.,  
715 L.V., M.K.W. and M.F.S.R developed the analysis approach; D.M., N.K., L.V., M.K.W.,  
716 K.H.M, O.J.H., T.E.J.B. and M.F.S.R. discussed the results and wrote the manuscript.

## 717 **Acknowledgments**

718 Work was funded by the Wellcome Trust (M.F.S.R.: WT100973AIA; M.K.W.:  
719 096589/Z/11/Z) and the NovoNordiskFoundation (NNF14OC0011413). N.K. is a  
720 Christ Church Junior Research Fellow. L.V. held a Marie Curie fellowship.

721

## 722 **References**

- 723 1. Behrens, T. E. J., Woolrich, M., Walton, M. E. & Rushworth, M. F. S. Learning  
724 the value of information in an uncertain world. *Nat. Neurosci.* **10**, 1214–1221  
725 (2007).
- 726 2. Nassar, M. R., Wilson, R. C., Heasly, B. & Gold, J. I. An Approximately Bayesian  
727 Delta-Rule Model Explains the Dynamics of Belief Updating in a Changing  
728 Environment. *J. Neurosci.* **30**, 12366–12378 (2010).
- 729 3. Bernacchia, A., Seo, H., Lee, D. & Wang, X.-J. A reservoir of time constants for  
730 memory traces in cortical neurons. *Nat. Neurosci.* **14**, 366–372 (2011).
- 731 4. Seo, H. & Lee, D. Cortical mechanisms for reinforcement learning in  
732 competitive games. *Philos. Trans. R. Soc. B Biol. Sci.* **363**, 3845–3857 (2008).
- 733 5. Seo, H. & Lee, D. Temporal Filtering of Reward Signals in the Dorsal Anterior  
734 Cingulate Cortex during a Mixed-Strategy Game. *J. Neurosci.* **27**, 8366–8377  
735 (2007).
- 736 6. Walton, M. E., Devlin, J. & Rushworth, M. F. S. Interactions between decision  
737 making and performance monitoring within prefrontal cortex. *Nat. Neurosci.*  
738 **7**, 1259–1265 (2004).
- 739 7. Kennerley, S. W., Walton, M. E., Behrens, T. E. J., Buckley, M. J. & Rushworth,  
740 M. F. S. Optimal decision making and the anterior cingulate cortex. *Nat.*  
741 *Neurosci.* **9**, 940–947 (2006).
- 742 8. Kennerley, S. W., Dahmubed, A. F., Lara, A. H. & Wallis, J. D. Neurons in the  
743 Frontal Lobe Encode the Value of Multiple Decision Variables. *J. Cogn.*  
744 *Neurosci.* **21**, 1162–1178 (2009).

- 745 9. Kolling, N., Behrens, T. E. J., Mars, R. B. & Rushworth, M. F. S. Neural  
746 Mechanisms of Foraging. *Science* **336**, 95–98 (2012).
- 747 10. Kolling, N., Wittmann, M. & Rushworth, M. F. S. Multiple Neural Mechanisms  
748 of Decision Making and Their Competition under Changing Risk Pressure.  
749 *Neuron* **81**, 1190–1202 (2014).
- 750 11. Scholl, J. *et al.* The Good, the Bad, and the Irrelevant: Neural Mechanisms of  
751 Learning Real and Hypothetical Rewards and Effort. *J. Neurosci.* **35**, 11233–  
752 11251 (2015).
- 753 12. Rushworth, M. F., Kolling, N., Sallet, J. & Mars, R. B. Valuation and decision-  
754 making in frontal cortex: one or many serial or parallel systems? *Curr. Opin.*  
755 *Neurobiol.* **22**, 946–955 (2012).
- 756 13. Hunt, L. T., Behrens, T. E., Hosokawa, T., Wallis, J. D. & Kennerley, S. W.  
757 Capturing the temporal evolution of choice across prefrontal cortex. *eLife* **4**,  
758 e11945 (2015).
- 759 14. Boorman, E. D., Behrens, T. E. J., Woolrich, M. W. & Rushworth, M. F. S. How  
760 Green Is the Grass on the Other Side? Frontopolar Cortex and the Evidence in  
761 Favor of Alternative Courses of Action. *Neuron* **62**, 733–743 (2009).
- 762 15. Waskom, M. L., Kumaran, D., Gordon, A. M., Rissman, J. & Wagner, A. D.  
763 Frontoparietal Representations of Task Context Support the Flexible Control  
764 of Goal-Directed Cognition. *J. Neurosci.* **34**, 10743–10755 (2014).
- 765 16. Medic, N. *et al.* Dopamine Modulates the Neural Representation of Subjective  
766 Value of Food in Hungry Subjects. *J. Neurosci.* **34**, 16856–16864 (2014).
- 767 17. Mars, R. B. *et al.* Diffusion-Weighted Imaging Tractography-Based  
768 Parcellation of the Human Parietal Cortex and Comparison with Human and

- 769 Macaque Resting-State Functional Connectivity. *J. Neurosci.* **31**, 4087–4100  
770 (2011).
- 771 18. Neubert, F.-X., Mars, R. B., Sallet, J. & Rushworth, M. F. S. Connectivity reveals  
772 relationship of brain areas for reward-guided learning and decision making  
773 in human and monkey frontal cortex. *Proc. Natl. Acad. Sci.* **112**, E2695–E2704  
774 (2015).
- 775 19. Rigoux, L., Stephan, K. E., Friston, K. J. & Daunizeau, J. Bayesian model  
776 selection for group studies — Revisited. *NeuroImage* **84**, 971–985 (2014).
- 777 20. Kolling, N., Behrens, T., Wittmann, M. & Rushworth, M. Multiple signals in  
778 anterior cingulate cortex. *Curr. Opin. Neurobiol.* **37**, 36–43 (2016).
- 779 21. Meder, D. *et al.* Tuning the Brake While Raising the Stake: Network Dynamics  
780 during Sequential Decision-Making. *J. Neurosci.* **36**, 5417–5426 (2016).
- 781 22. Rudebeck, P. H. *et al.* Frontal Cortex Subregions Play Distinct Roles in Choices  
782 between Actions and Stimuli. *J. Neurosci.* **28**, 13775–13785 (2008).
- 783 23. Kolling, N. *et al.* Value, search, persistence and model updating in anterior  
784 cingulate cortex. *Nat. Neurosci.* **19**, 1280–1285 (2016).
- 785 24. Wittmann, M. K. *et al.* Predictive decision making driven by multiple time-  
786 linked reward representations in the anterior cingulate cortex. *Nat. Commun.*  
787 **7**, 12327 (2016).
- 788 25. Quilodran, R., Rothé, M. & Procyk, E. Behavioral Shifts and Action Valuation in  
789 the Anterior Cingulate Cortex. *Neuron* **57**, 314–325 (2008).
- 790 26. Stoll, F. M., Fontanier, V. & Procyk, E. Specific frontal neural dynamics  
791 contribute to decisions to check. *Nat. Commun.* **7**, 11990 (2016).
- 792 27. Procyk, E. *et al.* Midcingulate Motor Map and Feedback Detection: Converging  
793 Data from Humans and Monkeys. *Cereb. Cortex* **26**, 467–476 (2016).

- 794 28. Gläscher, J. & Büchel, C. Formal Learning Theory Dissociates Brain Regions  
795 with Different Temporal Integration. *Neuron* **47**, 295–306 (2005).
- 796 29. Harvey, B. M., Klein, B. P., Petridou, N. & Dumoulin, S. O. Topographic  
797 Representation of Numerosity in the Human Parietal Cortex. *Science* **341**,  
798 1123–1126 (2013).
- 799 30. Kunishio, K. & Haber, S. N. Primate cingulostriatal projection: Limbic striatal  
800 versus sensorimotor striatal input. *J. Comp. Neurol.* **350**, 337–356 (1994).
- 801 31. Chau, B. K. H., Kolling, N., Hunt, L. T., Walton, M. E. & Rushworth, M. F. S. A  
802 neural mechanism underlying failure of optimal choice with multiple  
803 alternatives. *Nat. Neurosci.* **17**, 463–470 (2014).
- 804 32. Economides, M., Guitart-Masip, M., Kurth-Nelson, Z. & Dolan, R. J. Anterior  
805 Cingulate Cortex Instigates Adaptive Switches in Choice by Integrating  
806 Immediate and Delayed Components of Value in Ventromedial Prefrontal  
807 Cortex. *J. Neurosci.* **34**, 3340–3349 (2014).
- 808 33. Hunt, L. T. *et al.* Mechanisms underlying cortical activity during value-guided  
809 choice. *Nat. Neurosci.* **15**, 470–476 (2012).
- 810 34. Jocham, G. *et al.* Dissociable contributions of ventromedial prefrontal and  
811 posterior parietal cortex to value-guided choice. *NeuroImage* **100**, 498–506  
812 (2014).
- 813 35. Jocham, G., Hunt, L. T., Near, J. & Behrens, T. E. A mechanism for value-guided  
814 choice based on the excitation-inhibition balance in prefrontal cortex. *Nat.*  
815 *Neurosci.* **15**, 960–961 (2012).
- 816 36. Noonan, M. P. *et al.* Separate value comparison and learning mechanisms in  
817 macaque medial and lateral orbitofrontal cortex. *Proc. Natl. Acad. Sci.* **107**,  
818 20547–20552 (2010).

- 819 37. Rushworth, M. F. S., Noonan, M. P., Boorman, E. D., Walton, M. E. & Behrens, T.  
820 E. Frontal Cortex and Reward-Guided Learning and Decision-Making. *Neuron*  
821 **70**, 1054–1069 (2011).
- 822 38. Tzourio-Mazoyer, N. *et al.* Automated Anatomical Labeling of Activations in  
823 SPM Using a Macroscopic Anatomical Parcellation of the MNI MRI Single-  
824 Subject Brain. *NeuroImage* **15**, 273–289 (2002).
- 825 39. Chaudhuri, R., Knoblauch, K., Gariel, M.-A., Kennedy, H. & Wang, X.-J. A Large-  
826 Scale Circuit Mechanism for Hierarchical Dynamical Processing in the  
827 Primate Cortex. *Neuron* **88**, 419–431 (2015).
- 828 40. Hasson, U., Chen, J. & Honey, C. J. Hierarchical process memory: memory as  
829 an integral component of information processing. *Trends Cogn. Sci.* **19**, 304–  
830 313 (2015).
- 831 41. Kiebel, S. J., Daunizeau, J. & Friston, K. J. A Hierarchy of Time-Scales and the  
832 Brain. *PLoS Comput Biol* **4**, e1000209 (2008).
- 833 42. Murray, J. D. *et al.* A hierarchy of intrinsic timescales across primate cortex.  
834 *Nat. Neurosci.* **17**, 1661–1663 (2014).
- 835 43. Wang, X.-J. & Kennedy, H. Brain structure and dynamics across scales: in  
836 search of rules. *Curr. Opin. Neurobiol.* **37**, 92–98 (2016).
- 837 44. Boorman, E. D., Rushworth, M. F. & Behrens, T. E. Ventromedial Prefrontal  
838 and Anterior Cingulate Cortex Adopt Choice and Default Reference Frames  
839 during Sequential Multi-Alternative Choice. *J. Neurosci.* **33**, 2242–2253  
840 (2013).
- 841 45. Boorman, E. D., Behrens, T. E. & Rushworth, M. F. Counterfactual Choice and  
842 Learning in a Neural Network Centered on Human Lateral Frontopolar  
843 Cortex. *PLoS Biol* **9**, e1001093 (2011).

- 844 46. Neta, M. *et al.* Spatial and Temporal Characteristics of Error-Related Activity  
845 in the Human Brain. *J. Neurosci.* **35**, 253–266 (2015).
- 846 47. Jenkinson, M., Beckmann, C. F., Behrens, T. E. J., Woolrich, M. W. & Smith, S. M.  
847 FSL. *NeuroImage* **62**, 782–790 (2012).
- 848 48. Woolrich, M. W., Ripley, B. D., Brady, M. & Smith, S. M. Temporal  
849 Autocorrelation in Univariate Linear Modeling of FMRI Data. *NeuroImage* **14**,  
850 1370–1386 (2001).
- 851 49. Watkins, C. J. C. H. & Dayan, P. Q-learning. *Mach. Learn.* **8**, 279–292 (1992).
- 852 50. Smith, S. M. Fast robust automated brain extraction. *Hum. Brain Mapp.* **17**,  
853 143–155 (2002).
- 854
